# 1 **A candidate gene cluster for the bioactive natural product**

## 2 **gyrophoric acid in lichen-forming fungi**

3

4 Garima Singh<sup>1,2,\*</sup>, Anjuli Calchera<sup>1</sup>, Dominik Merges<sup>1</sup>, Jürgen Otte<sup>1</sup>, Imke Schmitt<sup>1,2,3</sup>,

5 Francesco Dal Grande<sup>1,2</sup>

6 <sup>1</sup> Senckenberg Biodiversity and Climate Research Centre (SBiK-F), 60325 Frankfurt am

7 Main, Germany \* e-mail: [garima.singh@senckenberg.de](mailto:garima.singh@senckenberg.de)

8 <sup>2</sup> LOEWE Center for Translational Biodiversity Genomics (TBG), 60325 Frankfurt am Main,

9 Germany

10 <sup>3</sup> Institute of Ecology, Diversity and Evolution, Goethe University, 60325 Frankfurt am Main,

11 Germany

12

13

## 14 **Key words**

15 Biosynthetic genes, depsides, fungi, genome mining, long-read sequencing, microbial

16 biotechnology, PKS phylogeny, Secondary metabolites, *Umbilicaria*

17

## 18 **Abstract**

19 Natural products of lichen-forming fungi are structurally diverse and have a variety of

20 medicinal properties. Despite this, they have limited implementation in industry, because the

21 corresponding genes remain unknown for most of the natural products. Here we implement a

22 long-read sequencing and bioinformatic approach to identify the biosynthetic gene cluster of  
23 the bioactive natural product gyrophoric acid (GA). Using 15 high-quality genomes  
24 representing nine GA-producing species of the lichen-forming fungal genus *Umbilicaria*, we  
25 identify the most likely GA cluster and investigate cluster gene organization and composition  
26 across the nine species. Our results show that GA clusters are promiscuous within  
27 *Umbilicaria*, with only three genes that are conserved across species, including the PKS gene.  
28 In addition, our results suggest that the same cluster codes for different but structurally similar  
29 NPs, i.e., GA, umbilicatic acid and hiassic acid, bringing new evidence that lichen metabolite  
30 diversity is also generated through regulatory mechanisms at the molecular level. Ours is the  
31 first study to identify the most likely GA cluster, and thus provides essential information to  
32 open new avenues for biotechnological approaches to producing and modifying GA and  
33 similar lichen-derived compounds. We show that bioinformatics approaches are useful in  
34 linking genes and potentially associated natural products. Genome analyses help unlocking  
35 the pharmaceutical potential of organisms such as lichens, which are biosynthetically diverse  
36 but slow growing, and difficult to cultivate due to their symbiotic nature.

37

## 38 **Importance**

39 The implementation of natural products in the pharmaceutical industry relies on the  
40 possibility of modifying the natural product (NP) pathway to optimize yields and  
41 pharmacological effects. Characterization of genes and pathways underlying natural product  
42 biosynthesis is a major bottleneck for the use of natural products in the pharmaceutical  
43 industry. Genome mining is a promising and relatively cost- and time-effective approach to  
44 exploit unexplored NP resources for drug discovery. In this study, we identify the most likely

45 gene cluster for the lichen-forming fungal depside gyrophoric acid in nine *Umbilicaria*  
46 species. This compound shows cytotoxic and antiproliferative properties against several  
47 cancer cell lines, and is also a broad-spectrum antimicrobial agent. We identify the putative  
48 GA cluster from nine *Umbilicaria* species. This information paves the way for generating GA  
49 analogs with modified properties by selective activation/deactivation of genes.

50

## 51 **Introduction**

52 Natural products (NPs) and their derivatives/analogs constitute about 70% of modern  
53 medicines (1, 2). NPs alone, however, i.e., unmodified molecules as produced by organisms  
54 themselves in nature, constitute only a small portion of this. The vast majority, about 60-65%,  
55 are derivatives and analogs of naturally-occurring substances, synthesized through  
56 biotechnology or synthetic approaches (2, 3). The use of NPs in the pharmaceutical industry  
57 relies on the ability to modify NP pathways in order to optimize yields and pharmacological  
58 effects. Culture-dependent approaches to identifying/producing NPs are labor-intensive and  
59 time-consuming, and not successful for every organism (4, 5). As a result, the biosynthetic  
60 potential of many biosynthetically prolific organisms remains untapped. Information on the  
61 genetic background and mechanisms of NP synthesis may thus contribute to fast-track NP-  
62 based drug discovery (2, 6).

63 Lichens, symbiotic organisms composed of fungal and photosynthetic partners (green  
64 algae or cyanobacteria, or both at the same time) (7–9), are a treasure chest of NPs (10–12).  
65 So far, about 1,000 NPs with great structural and functional diversity have been reported from  
66 lichen-forming fungi (LFF), and about 300-400 have been screened for bioactivity (11).  
67 However, the genetic background of more than 97% of lichen NPs is unknown (13–16).

68 Lichen compounds have great pharmacological potential, encompassing antimicrobial,  
69 antiproliferative, cytotoxic and antioxidant properties (11, 17–20). However, there are various  
70 major bottlenecks for using lichen NPs in the pharmaceutical industry, including low yield in  
71 nature, slow growth, tedious isolation/culturing methods, and a lack of understanding of their  
72 genetic background. Targeted genome mining approaches integrate the latest DNA  
73 sequencing technologies with computational advancements and large, publicly-available  
74 databases of pre-identified BGCs to characterize genes coding for NPs (1, 21, 22). This  
75 approach combines genome mining with the expected genetics of the NP to narrow down the  
76 candidate biosynthetic genes.

77 In-silico approaches for linking natural products with their respective biosynthetic  
78 gene clusters (BGCs) – genomic clusters of biosynthetic-related genes typically found in  
79 fungi (23–25) – are becoming more common in LFF due to the increased availability of  
80 genomic resources and databases (1, 21, 22), improvement of detection software and genome  
81 mining tools, stabilizing PKS phylogenies, and information gained from recent successes in  
82 the heterologous expression of *PKSs* from LFF (13, 14). For instance, the clade “Group I,  
83 PKS 16” from Kim et al (13) is associated with the biosynthesis of orsellinic acid derivatives  
84 (orcinol depsides and depsidones) such as lecanoric acid (14), grayanic acid (15), physodic  
85 acid and olivetoric acid (16), whereas the clade “Group IX, PKS23” from Kim et al (13) is  
86 associated with the biosynthesis of methylated orsellinic acid derivatives ( $\beta$ -orcinol depsides  
87 and depsidones) such as atranorin. The cluster linked to usnic acid biosynthesis is also fairly  
88 well understood (26, 27) and corresponds to “Group VI, PKS8” from Kim et al (11).

89 Here, we combine high-throughput long-read sequencing with a comparative  
90 genomics approach to identify the putative cluster(s) linked to the synthesis of gyrophoric  
91 acid (GA). GA is an NP produced by several LFF species, with a broad spectrum of

92 bioactivity (pharmacological properties such as anticancer and antimicrobial activity and  
93 industrially-relevant properties such as usage as dyes (19, 28–30)), for which the molecular  
94 mechanism and genetics of synthesis remain unknown. Identification of the GA gene cluster  
95 would facilitate its production via biotechnology to optimize the yield as well as to generate  
96 GA analogs with the desired pharmaceutical effect. For this study, we chose nine species of  
97 GA producers belonging to the lichen-forming fungal genus *Umbilicaria* (Table 1). GA is the  
98 most characteristic compound of this genus, and is found at high concentrations in all the  
99 chosen species (28, 31–33). It is a depside containing three orsellinic acid-type rings joined  
100 together by ester bonds (Fig. 1). Apart from GA, several other structurally-related depsides  
101 such as umbilicarinic acid, lecanoric acid and hiassic acid (Fig. 1) have also been reported from  
102 *Umbilicaria*, but these usually constitute a minor fraction (<10%) of the total NPs detected  
103 via HPLC (Fig. 1).

104 In the present study, we assembled highly contiguous long-read-based genomes of  
105 LFF of the genus *Umbilicaria*, identified the biosynthetic gene clusters of all the species and  
106 singled out candidate genes linked to GA biosynthesis.

107

## 108 **Materials and methods**

### 109 **Sampling and dataset**

110 We collected samples of the following eight *Umbilicaria* species: *U. deusta*, *U. freyi*, *U.*  
111 *grisea*, *U. subpolyphylla*, *U. hispanica*, *U. phaea*, *U. pustulata*, and *U. spodochroa* for  
112 genome sequencing (voucher information in Supplementary Table S1). When possible, we  
113 sequenced two samples of the same species collected in different climatic zones. This was  
114 done to take into account possible intra-specific variation in BGC content as recently shown

115 in Singh et al. (34). The genome of *U. muhlenbergii* was downloaded from the JGI database.

116 In addition, we sampled *Dermatocarpon miniatum* as a control, as it does not produce

117 depsides/depsidones.

118

### 119 **DNA extraction, library preparation and genome sequencing**

120 Lichen thalli were thoroughly washed with sterile water, and checked under the

121 stereomicroscope for the presence of possible contamination and other lichen thalli. DNA was

122 extracted from all the samples using a CTAB-based method (35) as presented in (36).

123 SMRTbell libraries were constructed according to the manufacturer's instructions of

124 the SMRTbell Express Prep Kit v. 2.0 following the Low DNA Input Protocol (Pacific

125 Biosciences, Menlo Park, CA). Total input for samples was approximately 170-800 ng.

126 Ligation with T-overhang SMRTbell adapters was performed at 20°C for 1 h or overnight.

127 Following ligation, the libraries were purified with a 0,45 x or 0,8 x AMPure PB bead clean

128 up step. The subsequent size selection step to remove SMRTbell templates <3 kb was

129 performed with 2,2 x of a 40% (v/v) AMPure PB bead working solution.

130 SMRT sequencing was performed on the Sequel System II with the Sequel II

131 Sequencing Kit 2.0 using the continuous long read (CLR) mode or the circular consensus

132 sequencing (CCS) mode, 30 h movie time with no pre-extension and Software SMRTLINK

133 8.0. Each metagenomic library was sequenced on one SMART cell at the Medical Center

134 Nijmegen (the Netherlands), or at MPI Dresden.

135

## 136 **Genome assembly and annotation**

137 The continuous long reads (i.e. CLR reads) from the PacBio Sequel II CLR run were first  
138 processed into highly accurate consensus sequences (i.e. HiFi reads) using PacBio tool CCS  
139 v5.0.0 with default parameters (<https://ccs.how>). HiFi reads were then assembled into contigs  
140 using the assembler metaFlye v2.7 (37). The resulting contigs were scaffolded with LRScf  
141 v1.1.12 ([github.com/shingocat/lrscaf](https://github.com/shingocat/lrscaf), (38)). The scaffolds were then taxonomically binned to  
142 extract Ascomyocota reads with blastx using DIAMOND (--more-sensitive --frameshift 15 --  
143 range-culling) on a custom database and following the MEGAN6 Community Edition  
144 pipeline (39). All scaffolds assigned to Ascomycota were extracted as to represent the  
145 *Umbilicaria* spp. Assembly statistics such as number of contigs, total length and N50 were  
146 accessed with Assemblathon v2 (40) (Table 1). The completeness of the received mycobiont  
147 bins (i.e. the fungal genomes) was estimated using Benchmarking Universal Single-Copy  
148 Orthologs (BUSCO) analysis in BUSCO v4 (41).

149

## 150 **Identification and Annotations of Biosynthetic Gene Clusters**

151 Functional annotation of genomes, including genes, proteins and BGC prediction  
152 (antiSMASH (antibiotics & SM Analysis Shell, v5.0)) was performed with scripts  
153 implemented in the funannotate pipeline (42, 43). First, the genomes were masked for  
154 repetitive elements, and then the gene prediction was performed using BUSCO2 to train  
155 Augustus and self-training GeneMark-ES (41, 44). Functional annotation was done with  
156 InterProScan (45), egg-NOG-mapper (46, 47) and BUSCO (41) with ascomycota\_db models.  
157 Secreted proteins were predicted using SignalP (48) as implemented in the funannotate  
158 'annotate' command.

159

## 160 **Selecting candidate gene clusters linked to GA biosynthesis**

161 We used the following criteria to select the candidate gene cluster associated with GA  
162 synthesis in *Umbilicaria*: 1) it must contain a NR-PKS (as some of the structural features of a  
163 NP can be directly inferred from the domain architecture of the *PKS*: *PKSs* without reducing  
164 domains (*NR-PKSs*) are linked to non-reduced compounds such as gyrophoric acid, olivetoric  
165 acid (16), physodic acid (16) and grayanic acid (15)), 2) it must be present in all the  
166 *Umbilicaria* genomes, as all the species have GA as the major secondary metabolite (33), and  
167 3) it must be closely related to the *PKSs* involved in the synthesis of orsellinic acid-based  
168 compounds (15, 16), because orsellinic acid units constitute the building blocks of GA.

169

## 170 **Phylogenetic analyses**

171 We extracted the amino acid sequences of all the NR-PKS from the BGCs predicted by the  
172 antiSMASH for all the *Umbilicaria* species and *Dermatocarpon miniatum* (Supplementary  
173 Table S2). Additionally, the NR-PKS sequences of the following species were downloaded  
174 from the previous publications and public databases: *Cladonia borealis*, *C. grayi*, *C.*  
175 *macilenta*, *C. metacorallifera*, *C. rangiferina*, *C. uncialis*, *Pseudevernia furfuracea*,  
176 *Stereocaulon alpinum* and *Umbilicaria muhlenbergii*. The final dataset contains amino acid  
177 sequences of 229 NR-PKSs from 18 species belonging to four LFF genera. The sequences  
178 were aligned using MAFFT as implemented in Geneious v5.4 (49, 50). Gaps were treated as  
179 missing data. The maximum likelihood search was performed on the aligned sequences with  
180 RAxML-HPC BlackBox v8.1.11 (51) on the Cipres Scientific gateway (52). Phylogenetic  
181 trees were visualized using iTOL (53).

182



## 183 **BGC clustering and novel BGCs: BiG-SCAPE and CORASON**

184 We used BiG-SCAPE and CORASON (54) to identify the gene cluster networks and infer  
185 evolutionary relationships among clusters of interest among different *Umbilicaria* spp. BiG-  
186 SCAPE utilizes antiSMASH (42) and MIBiG databases (55) for inferring BGC sequence  
187 similarity networks, whereas CORASON employs a phylogenomic approach to infer  
188 evolutionary relationships between the clusters. BiG-SCAPE v1.0.1 was run in --auto mode,  
189 to identify BGC families using antiSMASH output files (.gbk) as input. Networks were  
190 generated using similarity thresholds of 0.25. The most likely GA cluster from all the  
191 *Umbilicaria* spp. was examined for conservation and variation among different *Umbilicaria*  
192 species using CORASON pipeline. The antiSMASH .gbk files of the corresponding clusters,  
193 based on phylogenetic grouping, were used as input. The most-likely GA cluster from *U.*  
194 *deusta* was used as reference to fish out the most closely-related clusters from the other  
195 *Umbilicaria* spp.

196

## 197 **Results**

### 198 **Genome sequencing, assembly and annotation**

199 The genome quality stats and assembly reports of all the genomes generated for this study are  
200 presented in Table 1.

201

### 202 **Phylogenetic analysis**

203 To search for PKS genes involved in the synthesis of GA, we performed a phylogenetic  
204 analysis by incorporating our sequences into the most comprehensive PKS dataset currently  
205 available (Supplementary Table S2) (13, 16). NR-PKSs have been categorized into nine

206 groups based on protein sequence similarity and PKS domain architecture (13). We identified  
207 a total of 110 NR-PKSs that were present in 15 *Umbilicaria* genomes (12 NR-PKSs on  
208 average per species). Four NR-PKSs were common to all species: PKS15, PKS16, PKS20 and  
209 a novel PKS clade (forming a monophyletic, supported clade to PKS33, Fig. 2). Only one  
210 NR-PKS per species formed a supported monophyletic clade with PKS16 (Group I, i.e.,  
211 orsellinic acid, depside and depsidone NR-PKSs) (Fig. 2). The most-likely NR-PKS for the  
212 depsidone grayanic acid and the depsides olivetoric and physodic acid fall within this PKS  
213 clade.

214

#### 215 **Gyrophoric acid cluster**

216 The cluster most likely associated with GA is the cluster containing PKS16 (Fig. 2), as 1) it is  
217 present in all *Umbilicaria* spp., 2) it contains an *NR-PKS* and 3) it forms a monophyletic  
218 group with the clade “Group I, PKS 16” from Kim et al (11). This cluster contains about 11-  
219 15 genes, including the core biosynthetic gene *NR-PKS* and a *cyt P450* (Fig. 3). The other  
220 genes code for unidentified proteins. The *U. deusta* PKS16 cluster is presented as an example  
221 of GA cluster (Fig. 3). The *PKS* is present in all *Umbilicaria* species investigated and displays  
222 high homology across species.

223

#### 224 **BGC clustering: BiG-SCAPE and CORASON**

225 BGC sequence similarity networks group gene clusters at multiple hierarchical levels. This  
226 analysis implements a ‘glocal’ alignment mode that accurately groups both complete and  
227 fragmented BGCs. The BGCs forming a supported monophyletic clade to PKS16 (Group I)  
228 were then analyzed for conservation across species using CORASON. The CORASON

229 analysis showed that only three genes on the cluster were shared among the studied  
230 *Umbilicaria* species: the core *PKS* and the two genes of unknown function/proteins adjacent  
231 to the core gene (Fig. 4).

232

## 233 **Discussion**

### 234 **Gyrophoric acid *PKS***

235 We found only one *PKS* per species forming a supported monophyletic clade to *PKS16*  
236 (Group I, i.e., orsellinic acid and depside/depsidone *PKSs*) (Fig. 2). These are the most likely  
237 GA *PKSs*.

238         The BGC associated with the biosynthesis of the following lichen depsides and  
239 depsidones have been identified so far: atranorin (13), lecanoric- (14), grayanic- (15),  
240 olivetoric- (16) and physodic acid (16). All these studies demonstrate that the *PKS* alone is  
241 capable of synthesizing the backbone depside, whereas modifications such as methylation and  
242 oxidation are made by enzymes coded by other genes in the cluster after the release of the  
243 depside from the *PKS*. For instance, the synthesis of atranorin involves at least three genes  
244 present within the atranorin cluster, but the core depside is coded only by the *PKS* (13). The  
245 other two genes, a carboxyl methylase (O-methyltransferase) and a *cyt P450*, methylate the  
246 carboxyl group and oxidize the methyl group (into -CHO), respectively, to produce the final  
247 product atranorin (Fig. 1). As GA does not have side chain modifications (Fig. 1) we propose  
248 that the *PKS* alone is involved in GA synthesis.

249         The depside *PKSs* identified so far code for didepsides, i.e. they contain two phenolic  
250 rings joined with an ester bond, for example grayanic acid, atranorin, physodic acid and  
251 olivetoric acid (13, 15, 16). Ours is the first study to identify the most-likely *PKS* associated

252 with a tridepside synthesis, i.e., three phenolic rings joined with two ester bonds. Our study  
253 suggests that the *PKSs* coding for a didepside and a tridepside differ only in the length of the  
254 sequence of the SAT domain. A tridepside *PKS* contains longer SAT coding sequence than  
255 the didepside *PKS*. The number of ACP and PT domains is the same between the two.

256

### 257 **GA cluster in *Umbilicaria* spp.**

258 The most-likely GA cluster contains about 11-15 genes in different *Umbilicaria* spp.  
259 (Fig. 3, 4). Interestingly, only three genes are common to all analyzed species, the *PKS* and  
260 two genes of unknown function (with low sequence similarity to known genes) upstream and  
261 downstream of the *PKS I* (Fig. 4). This suggests that these three genes form an integral part of  
262 the GA cluster, whereas the other genes are facultative among GA producers. Differences  
263 among the clusters synthesizing the same compound have been reported before, and have  
264 been associated with species-specific BGC regulation or modifications to the depside released  
265 by the *PKS* (26, 56).

266 The most-likely GA cluster also contains a *cyt P450* (Fig. 3, 4), which has been  
267 associated with depsidone production or oxidation of an acyl chain (13, 15, 16). However, the  
268 location and orientation of the *cyt P450* in the putative *Umbilicaria* GA cluster is different  
269 from a typical depsidone cluster (Fig. 3) (15). In the GA cluster, the *cyt P450* is not located  
270 next to and has the same orientation as the *PKS*, whereas in a depsidone cluster, *cyt P450* lies  
271 next to the *PKS*, in opposite orientation. Such organization is suggestive of genes being  
272 regulated and co-expressed by the same promoter (15). This is the case for the depsidone  
273 grayanic acid synthesis (in *Cladonia grayi*), which involves the synthesis of the depside  
274 intermediate by *PKS* followed by oxidation of the released depside into depsidone (15). The  
275 *PKS* and *cyt P450* form the integral part of depsidone synthesis (57) whereas the depside is  
12

276 coded by the *PKS* alone, with the exception of the side chain modifications (13, 14).  
277 Therefore, despite being part of the GA cluster, the *cyt P450* does not seem to be involved in  
278 GA synthesis or in the synthesis of umbilicarinic- and/or lecanoric acid reported from  
279 *Umbilicaria* spp. analyzed in this study. The synthesis of hiassic acid however would require  
280 the hydroxylation of a methyl group by *cyt P450* enzyme after the depside is released from  
281 the *PKS* (Fig. 1, the OH group in bold in hiassic acid). The lower proportion of hiassic acid as  
282 compared to GA could be because the *cyt P450* may not be co-expressed with the *PKS*.

283         Even though the functions of most of the genes identified in the present study are  
284 unknown, our study provides novel insights into GA cluster composition and organization  
285 across different species (Fig. 4). This information is crucial in order to open the way for future  
286 genetic manipulation of the GA biosynthetic pathway that may be aimed at increasing  
287 structural diversity and/or yield of the products, as well as in order to generate analogs with  
288 novel properties.

289

### 290 **One cluster, different compounds**

291 Variation in cluster composition reflects the potential to produce diverse NPs. Apart from GA,  
292 other depsides related in structure to GA, i.e., lecanoric-, umbilicarinic- and hiassic acid (Fig. 1)  
293 are often reported in *Umbilicaria* spp. as minor metabolites (31). Interestingly, we found only  
294 one orcinol-depside *PKS* in *Umbilicaria* spp (Fig. 2). This strongly indicates that all the  
295 *Umbilicaria* depsides are coded by the same *PKS* cluster. One cluster coding for different,  
296 structurally-related compounds has also been reported previously (16, 56, 58). For instance, in  
297 the case of the antifungal drug caspofungin acetate, a semisynthetic derivative of the NP  
298 pneumocandins from the fungus *Glarea lozoyensis*, selective inactivation of different genes in  
299 this biosynthetic gene cluster generates 13 different analogues, some of them with elevated

300 antifungal activity relative to the original compound and its semisynthetic derivative (59).  
301 Similarly, the aspyridone biosynthetic cluster from *Aspergillus nidulans* produces eight  
302 different compounds in a heterologous host (58). These studies show that a single PKS cluster  
303 is capable of producing different compounds depending upon which genes are co-expressed  
304 and on the available starters. In lichens, a single *PKS* has been associated with the synthesis of  
305 olivetoric and physodic acid (16) and the same *PKS* has been shown to be involved in the  
306 synthesis of lecanoric acid in a heterologous host (14). We propose that the same PKS cluster  
307 is most likely involved in the synthesis of GA, umbilicatic- (an additional methyl group, Fig.  
308 1), hiassic- (additional hydroxyl group, Fig. 1), and lecanoric acid (didepside with no side  
309 chains, Fig. 1) in *Umbilicaria*. It is possible, however, that in nature only GA is synthesized in  
310 members of the genus *Umbilicaria*, and the co-occurring minor compound lecanoric acid is a  
311 hydrolysis product of GA (57).

312 Interestingly, although umbilicatic acid is reported from some *Umbilicaria* species (*U.*  
313 *grisea*, *U. freyi*, *U. mühlenbergii* and *U. subpolyphylla* (31, 61)), O-methyltransferase (OMT)  
314 was not identified in the depside-related BGC of any *Umbilicaria* species (Fig. 3). OMT  
315 would be required for the methylation of oxygen to produce umbilicatic acid (Fig. 1). Its  
316 absence from depside-related BGCs suggests that an external OMT, e.g. from other BGCs,  
317 might be involved in the production of umbilicatic acid in *Umbilicaria*. This could explain the  
318 lower amounts of umbilicatic acid as compared to GA found in these species (31). In contrast,  
319 when the O-methylated compound is the major secondary metabolite, as in the case of  
320 grayanic acid and atranorin, OMT is an integral part of the BGC and is co-expressed along  
321 with the other crucial genes for grayanic acid production, i.e., the *PKS* and *cyt P450* (13, 15).

322

### 323 **Future perspectives**

324 Advances in long-read sequencing and in computational approaches to genome mining not  
325 only enable linking biosynthetic genes to NPs but also provide an overview of the entire gene  
326 cluster composition and organization. Ours is the first study to identify the most-likely GA  
327 cluster, which is essential for opening up avenues for biotechnological approaches to  
328 producing and modifying this compound and possibly other lichen compounds. In particular,  
329 this information can be applied to generate novel NP analogs with improved pharmacological  
330 properties via synthetic biology, biotechnology and combinatorial biosynthesis approaches.  
331 This paves the way to an entirely new horizon for utilizing these understudied taxa for  
332 pharmacological industry and drug discovery.

333

### 334 **Acknowledgements**

335 We thank Prof. Daniele Armaleo (Duke University) for his inputs on the domain composition  
336 of didepsides and tridepsides.

337

### 338 **Figure legends**

339 **Figure 1** Chemical structures and nomenclature. Structure of a lichen depside, atranorin, GA  
340 and other depsides produced by *Umbilicaria* spp.

341 **Figure 2** NR-PKS phylogeny of lichen-forming fungi. This is a maximum-likelihood tree  
342 based on amino acid sequences of NR-PKSs from nine *Umbilicaria* spp., six *Cladonia* spp.,  
343 *Dermatocarpon miniatum*, *Stereocaulon alpinum* and *Pseudevernia furfuracea*. Branches in

344 bold indicate bootstrap support >70%. Green color clades represent the PKSs common to all  
345 nine *Umbilicaria* spp. used in this study. PKS groups are based on Kim et al. (13).

346 **Figure 3** Gyrophoric acid cluster from *Umbilicaria deusta* as predicted by antiSMASH.

347 Colored boxes indicate genes. Genes in grey represent genes coding for unknown proteins

348 **Figure 4** CORASON-based PKS phylogeny to elucidate evolutionary relationships and

349 cluster organization of GA cluster in *Umbilicaria* spp. The bar plot below depicts the

350 percentage of *Umbilicaria* species in which a particular gene is present.

351

352 **Table 1:** Genome quality and annotation statistics

353 **Supplementary Tables**

- 354 1. Voucher information table of the *Umbilicaria* samples collected for this study.
- 355 2. Dataset used for the phylogenetic analysis, along with the amino acid sequences of the  
356 PKS

357

## 358 **References**

- 359 1. Newman DJ, Cragg GM. 2016. Natural products as sources of new drugs from 1981 to  
360 2014. J Nat Prod. American Chemical Society.
- 361 2. Newman DJ, Cragg GM. 2020. Natural products as sources of new drugs over the  
362 nearly four decades from 01/1981 to 09/2019. J Nat Prod. American Chemical Society.
- 363 3. Newman DJ, Cragg GM. 2007. Natural products as sources of new drugs over the last  
364 25 years. J Nat Prod.
- 365 4. Xu W, Klumbys E, Ang EL, Zhao H. 2020. Emerging molecular biology tools and  
366 strategies for engineering natural product biosynthesis. Metab Eng Commun. Elsevier



- 367 B.V.
- 368 5. Palazzotto E, Tong Y, Lee SY, Weber T. 2019. Synthetic biology and metabolic  
369 engineering of actinomycetes for natural product discovery. *Biotechnol Adv.* Elsevier  
370 Inc.
- 371 6. Atanasov AG, Zotchev SB, Dirsch VM, Orhan IE, Banach M, Rollinger JM, Barreca  
372 D, Weckwerth W, Bauer R, Bayer EA, Majeed M, Bishayee A, Bochkov V, Bonn GK,  
373 Braidy N, Bucar F, Cifuentes A, D'Onofrio G, Bodkin M, Diederich M, Dinkova-  
374 Kostova AT, Efferth T, El Bairi K, Arkells N, Fan TP, Fiebich BL, Freissmuth M,  
375 Georgiev MI, Gibbons S, Godfrey KM, Gruber CW, Heer J, Huber LA, Ibanez E,  
376 Kijjoo A, Kiss AK, Lu A, Macias FA, Miller MJS, Mocan A, Müller R, Nicoletti F,  
377 Perry G, Pittalà V, Rastrelli L, Ristow M, Russo GL, Silva AS, Schuster D, Sheridan  
378 H, Skalicka-Woźniak K, Skaltsounis L, Sobarzo-Sánchez E, Bredt DS, Stuppner H,  
379 Sureda A, Tzvetkov NT, Vacca RA, Aggarwal BB, Battino M, Giampieri F, Wink M,  
380 Wolfender JL, Xiao J, Yeung AWK, Lizard G, Popp MA, Heinrich M, Berindan-  
381 Neagoe I, Stadler M, Daglia M, Verpoorte R, Supuran CT. 2021. Natural products in  
382 drug discovery: advances and opportunities. *Nat Rev Drug Discov.* Nature Research.
- 383 7. Hawksworth DL, Honegger R. 1994. The lichen thallus: a symbiotic phenotype of  
384 nutritionally specialized fungi and its response to gall producers., p. 77–98. *In*  
385 Williams, MAJ (ed.), *Plant Galls: Organisms, Interactions, Populations*. Clarendon  
386 Press, Oxford.
- 387 8. Ahmadjian V. 1993. *The Lichen Symbiosis*. John Wiley and Sons., New York.
- 388 9. Ahmadjian V. 1982. Algal/fungal symbioses., p. 179–233. *In* Round, FE Chapman, DJ  
389 (ed.), *Progress in Phycological Research*. Elsevier Biomedical Press, Amsterdam.
- 390 10. Calchera A, Dal Grande F, Bode HB, Schmitt I. 2019. Biosynthetic gene content of the  
17

- 391 “perfume lichens” *Evernia prunastri* and *Pseudevernia furfuracea*. *Molecules* 24:203.
- 392 11. Goga M, Elečko J, Marcinčinová M, Ručová D, Bačkorová M, Bačkor M. 2020.
- 393 Lichen metabolites: an overview of some secondary metabolites and their biological
- 394 potential, p. 175–209. *In* .
- 395 12. Boustie J, Grube M. 2005. Lichens—a promising source of bioactive secondary
- 396 metabolites. *Plant Genet Resour* 3:273–287.
- 397 13. Kim W, Liu R, Woo S, Kang K Bin, Park H, Yu YH, Ha H-H, Oh S-Y, Yang JH, Kim
- 398 H, Yun S-H, Hur J-S. 2021. Linking a gene cluster to atranorin, a major cortical
- 399 substance of lichens, through genetic dereplication and heterologous expression. *MBio*
- 400 e0111121.
- 401 14. Kealey JT, Craig JP, Barr PJ. 2021. Identification of a lichen depside polyketide
- 402 synthase gene by heterologous expression in *Saccharomyces cerevisiae*. *Metab Eng*
- 403 *Commun* e00172.
- 404 15. Armaleo D, Sun X, Culberson C. 2011. Insights from the first putative biosynthetic
- 405 gene cluster for a lichen depside and depsidone. *Mycologia* 103:741–754.
- 406 16. Singh G, Armaleo D, Dal Grande F, Schmitt I. 2021. Depside and depsidone synthesis
- 407 in lichenized fungi comes into focus through a genome-wide comparison of the
- 408 olivetoric acid and physodic acid chemotypes of *Pseudevernia furfuracea*.
- 409 *Biomolecules* 11:1445.
- 410 17. Barbero M, Artuso E, Prandi C. 2017. Fungal anticancer metabolites: synthesis towards
- 411 drug discovery. *Curr Med Chem* 25:141–185.
- 412 18. Stanojković T. 2015. Investigations of lichen secondary metabolites with potential
- 413 anticancer activity, p. 127–146. *In* *Lichen Secondary Metabolites: Bioactive Properties*
- 414 *and Pharmaceutical Potential*. Springer International Publishing.

- 415 19. Ingelfinger R, Henke M, Roser L, Ulshöfer T, Calchera A, Singh G, Parnham MJ,  
416 Geisslinger G, Fürst R, Schmitt I, Schiffmann S. 2020. Unraveling the pharmacological  
417 potential of lichen extracts in the context of cancer and inflammation with a broad  
418 screening approach. *Front Pharmacol* 11:1322.
- 419 20. Molnár K, Farkas E. 2010. Current results on biological activities of lichen secondary  
420 metabolites: A review. *Zeitschrift für Naturforsch - Sect C J Biosci*. Verlag der  
421 *Zeitschrift für Naturforschung*.
- 422 21. Van Santen JA, Kautsar SA, Medema MH, Linington RG. 2021. Microbial natural  
423 product databases: Moving forward in the multi-omics era. *Nat Prod Rep*. Royal  
424 Society of Chemistry.
- 425 22. Bachmann BO, Van Lanen SG, Baltz RH. 2014. Microbial genome mining for  
426 accelerated natural products discovery: Is a renaissance in the making? *J Ind Microbiol*  
427 *Biotechnol*. *J Ind Microbiol Biotechnol*.
- 428 23. Hoffmeister D, Keller NP. 2007. Natural products of filamentous fungi: Enzymes,  
429 genes, and their regulation. *Nat Prod Rep*.
- 430 24. Keller NP. 2019. Fungal secondary metabolism: regulation, function and drug  
431 discovery. *Nat Rev Microbiol*. Nature Publishing Group.
- 432 25. Brakhage AA. 2013. Regulation of fungal secondary metabolism. *Nat Rev Microbiol*.
- 433 26. Pizarro D, Divakar PK, Grewe F, Crespo A, Dal Grande F, Lumbsch HT. 2020.  
434 Genome-wide analysis of biosynthetic gene cluster reveals correlated gene loss with  
435 absence of usnic acid in lichen-forming fungi. *Genome Biol Evol* 12:1858–1868.
- 436 27. Abdel-Hameed M, Bertrand RL, Piercey-Normore MD, Sorensen JL. 2016. Putative  
437 identification of the usnic acid biosynthetic gene cluster by de novo whole-genome  
438 sequencing of a lichen-forming fungus. *Fungal Biol* 120:306–316.

- 439 28. Nguyen K-H, Chollet-Krugler M, Gouault N, Tomasi S. 2013. UV-protectant  
440 metabolites from lichens and their symbiotic partners. *Nat Prod Rep* 30:1490.
- 441 29. Lohezic-Le Devehat F, Legouin B, Couteau C, Boustie J, Coiffard L. 2013. Lichenic  
442 extracts and metabolites as UV filters. *J Photochem Photobiol B Biol* 120:17–28.
- 443 30. Buçukoglu TZ, Albayrak S, Halici MG, Tay T. 2013. Antimicrobial and antioxidant  
444 activities of extracts and lichen acids obtained from some *Umbilicaria* species from  
445 central Anatolia, Turkey. *J Food Process Preserv* 37:1103–1110.
- 446 31. Posner B, Feige GB, Huneck S. 1992. Studies on the chemistry of the lichen genus  
447 *Umbilicaria* hoffm. *Zeitschrift fur Naturforsch - Sect C J Biosci* 47:1–9.
- 448 32. Narui T, Culberson CF, Culberson WL, Johnson A, Shibata S. 1996. A contribution to  
449 the chemistry of the lichen family umbilicariaceae (Ascomycotina). *Bryologist* 99:199–  
450 211.
- 451 33. Davydov EA, Peršoh D, Rambold G. 2017. Umbilicariaceae (lichenized Ascomycota)  
452 – Trait evolution and a new generic concept. *Taxon* 66:1282–1303.
- 453 34. Singh G, Calchera A, Schulz M, Drechsler M, Bode HB, Schmitt I, Dal Grande F.  
454 2021. Climate-specific biosynthetic gene clusters in populations of a lichen-forming  
455 fungus. *Environ Microbiol* 00:1462-2920.15605.
- 456 35. Rubio-Piña JA, Zapata-Pérez O. 2011. Isolation of total RNA from tissues rich in  
457 polyphenols and polysaccharides of mangrove plants. *Electron J Biotechnol* 14.
- 458 36. Merges D, Dal Grande F, Greve C, Otte J, Schmitt I. 2021. Virus diversity in  
459 metagenomes of a lichen symbiosis (*Umbilicaria phaea*): complete viral genomes,  
460 putative hosts and elevational distributions. *Environ Microbiol* 23:6637–6650.
- 461 37. Kolmogorov M, Yuan J, Lin Y, Pevzner PA. 2019. Assembly of long, error-prone  
462 reads using repeat graphs. *Nat Biotechnol* 37:540–546.

- 463 38. Qin M, Wu S, Li A, Zhao F, Feng H, Ding L, Ruan J. 2019. LRScarf: Improving draft  
464 genomes using long noisy reads. *BMC Genomics* 20:955.
- 465 39. Huson DH, Beier S, Flade I, Górska A, El-Hadidi M, Mitra S, Ruscheweyh H-J, Tappu  
466 R. 2016. MEGAN Community Edition - Interactive exploration and analysis of large-  
467 scale microbiome sequencing data. *PLOS Comput Biol* 12:e1004957.
- 468 40. Bradnam KR, Fass JN, Alexandrov A, Baranay P, Bechner M, Birol I, Boisvert S,  
469 Chapman JA, Chapuis G, Chikhi R, Chitsaz H, Chou W-C, Corbeil J, Del Fabbro C,  
470 Docking TR, Durbin R, Earl D, Emrich S, Fedotov P, Fonseca NA, Ganapathy G,  
471 Gibbs RA, Gnerre S, Godzaridis É, Goldstein S, Haimel M, Hall G, Haussler D, Hiatt  
472 JB, Ho IY, Howard J, Hunt M, Jackman SD, Jaffe DB, Jarvis ED, Jiang H, Kazakov S,  
473 Kersey PJ, Kitzman JO, Knight JR, Koren S, Lam T-W, Lavenier D, Laviolette F, Li  
474 Y, Li Z, Liu B, Liu Y, Luo R, MacCallum I, MacManes MD, Maillet N, Melnikov S,  
475 Naquin D, Ning Z, Otto TD, Paten B, Paulo OS, Phillippy AM, Pina-Martins F, Place  
476 M, Przybylski D, Qin X, Qu C, Ribeiro FJ, Richards S, Rokhsar DS, Ruby JG,  
477 Scalabrin S, Schatz MC, Schwartz DC, Sergushichev A, Sharpe T, Shaw TI, Shendure  
478 J, Shi Y, Simpson JT, Song H, Tsarev F, Vezzi F, Vicedomini R, Vieira BM, Wang J,  
479 Worley KC, Yin S, Yiu S-M, Yuan J, Zhang G, Zhang H, Zhou S, Korf IF. 2013.  
480 Assemblathon 2: evaluating de novo methods of genome assembly in three vertebrate  
481 species. *Gigascience* 2:10.
- 482 41. Simão FA, Waterhouse RM, Ioannidis P, Kriventseva E V., Zdobnov EM. 2015.  
483 BUSCO: assessing genome assembly and annotation completeness with single-copy  
484 orthologs. *Bioinformatics* 31:3210–3212.
- 485 42. Blin K, Shaw S, Steinke K, Villebro R, Ziemert N, Lee SY, Medema MH, Weber T.  
486 2019. antiSMASH 5.0: updates to the secondary metabolite genome mining pipeline.

- 487 Nucleic Acids Res 47:W81–W87.
- 488 43. Palmer J, Stajich J. 2019. Funannotate v1.7.4. Zenodo  
489 <https://doi.org/https://doi.org/10.5281/ZENODO.2604804>.
- 490 44. Borodovsky M, Lomsadze A. 2011. Eukaryotic gene prediction using GeneMark.hmm-  
491 E and GeneMark-ES. *Curr Protoc Bioinforma* CHAPTER:Unit-4.610.
- 492 45. Quevillon E, Silventoinen V, Pillai S, Harte N, Mulder N, Apweiler R, Lopez R. 2005.  
493 InterProScan: Protein domains identifier. *Nucleic Acids Res* 33:W116.
- 494 46. Huerta-Cepas J, Szklarczyk D, Heller D, Hernández-Plaza A, Forslund SK, Cook H,  
495 Mende DR, Letunic I, Rattei T, Jensen LJ, Von Mering C, Bork P. 2019. EggNOG 5.0:  
496 A hierarchical, functionally and phylogenetically annotated orthology resource based  
497 on 5090 organisms and 2502 viruses. *Nucleic Acids Res* 47:D309–D314.
- 498 47. Huerta-Cepas J, Forslund K, Coelho LP, Szklarczyk D, Jensen LJ, Von Mering C,  
499 Bork P. 2017. Fast genome-wide functional annotation through orthology assignment  
500 by eggNOG-mapper. *Mol Biol Evol* 34:2115–2122.
- 501 48. Almagro Armenteros JJ, Tsirigos KD, Sønderby CK, Petersen TN, Winther O, Brunak  
502 S, von Heijne G, Nielsen H. 2019. SignalP 5.0 improves signal peptide predictions  
503 using deep neural networks. *Nat Biotechnol* 37:420–423.
- 504 49. Katoh K, Kuma K, Toh H, Miyata T. 2005. MAFFT version 5: improvement in  
505 accuracy of multiple sequence alignment. *Nucleic Acids Res* 33:511–8.
- 506 50. Drummond AJ, Ashton B, Buxton S, Cheung M, Cooper A, Duran C, Field M, Heled J,  
507 Kearse M, Markowitz S, Moir R, Stones-Havas S, Sturrock S, Thierer T, Wilson A.  
508 2011. Geneious. 5.4.
- 509 51. Stamatakis A. 2006. RAxML-VI-HPC: maximum likelihood-based phylogenetic  
510 analyses with thousands of taxa and mixed models. *Bioinformatics* 22:2688–90.

- 511 52. Miller MA, Pfeiffer W, Schwartz T. 2010. Creating the CIPRES Science Gateway for  
512 inference of large phylogenetic trees, p. 1–8. *In* Proceedings of the Gateway  
513 Computing Environments Workshop (GCE)New Orlean.
- 514 53. Letunic I, Bork P. 2021. Interactive tree of life (iTOL) v5: An online tool for  
515 phylogenetic tree display and annotation. *Nucleic Acids Res* 49:W293–W296.
- 516 54. Navarro-Muñoz JC, Selem-Mojica N, Mallowney MW, Kautsar SA, Tryon JH,  
517 Parkinson EI, De Los Santos ELC, Yeong M, Cruz-Morales P, Abubucker S, Roeters  
518 A, Lokhorst W, Fernandez-Guerra A, Cappelini LTD, Goering AW, Thomson RJ,  
519 Metcalf WW, Kelleher NL, Barona-Gomez F, Medema MH. 2020. A computational  
520 framework to explore large-scale biosynthetic diversity. *Nat Chem Biol* 16:60–68.
- 521 55. Kautsar SA, Blin K, Shaw S, Navarro-Muñoz JC, Terlouw BR, Van Der Hooft JJJ,  
522 Van Santen JA, Tracanna V, Suarez Duran HG, Pascal Andreu V, Selem-Mojica N,  
523 Alanjary M, Robinson SL, Lund G, Epstein SC, Sisto AC, Charkoudian LK, Collemare  
524 J, Linington RG, Weber T, Medema MH. 2020. MIBiG 2.0: A repository for  
525 biosynthetic gene clusters of known function. *Nucleic Acids Res* 48:D454–D458.
- 526 56. Martinet L, Naômé A, Deflandre B, Maciejewska M, Tellatin D, Tenconi E,  
527 Smargiasso N, De Pauw E, Van Wezel GP, Rigali S. 2019. A single biosynthetic gene  
528 cluster is responsible for the production of bagremycin antibiotics and feroverdin iron  
529 chelators. *MBio* 10:e01230-19.
- 530 57. Armaleo D. 1995. Factors affecting depside and depsidone biosynthesis in a cultured  
531 lichen fungus. *Crypt Bot* 5:14–21.
- 532 58. Wasil Z, Pahirulzaman KAK, Butts C, Simpson TJ, Lazarus CM, Cox RJ. 2013. One  
533 pathway, many compounds: Heterologous expression of a fungal biosynthetic pathway  
534 reveals its intrinsic potential for diversity. *Chem Sci* 4:3845–3856.

- 535 59. Chen L, Yue Q, Zhang X, Xiang M, Wang C, Li S, Che Y, Ortiz-López FJ, Bills GF,  
536 Liu X, An Z. 2013. Genomics-driven discovery of the pneumocandin biosynthetic gene  
537 cluster in the fungus *Glarea lozoyensis*. *BMC Genomics* 14.
- 538 60. Leuckert C. 1985. Probleme der Flechten-Chemotaxonomie -- Stoffkombinationen und  
539 ihre taxonomische Wertung. Problems of lichen chemotaxonomy -- patterns of  
540 substances and their taxonomical valuation. *Ber Dtsch Bot Ges* 98:401–408.
- 541 61. Davydov EA, Blum OB, Kashevarov GP, Grakhov VP. 2019. Umbilicaria  
542 subpolyphylla Oxner: The correct name for *U. iberica* Sancho & Krzewicka and its  
543 bipolar distribution pattern. *Lichenologist*. Cambridge University Press.
- 544
- 545 2. Newman DJ, Cragg GM. 2020. Natural products as sources of new drugs over the  
546 nearly four decades from 01/1981 to 09/2019. *J Nat Prod*. American Chemical Society.
- 547 3. Newman DJ, Cragg GM. 2007. Natural products as sources of new drugs over the last  
548 25 years. *J Nat Prod*.
- 549 4. Atanasov AG, Zotchev SB, Dirsch VM, Orhan IE, Banach M, Rollinger JM, Barreca  
550 D, Weckwerth W, Bauer R, Bayer EA, Majeed M, Bishayee A, Bochkov V, Bonn GK,  
551 Braidy N, Bucar F, Cifuentes A, D’Onofrio G, Bodkin M, Diederich M, Dinkova-  
552 Kostova AT, Efferth T, El Bairi K, Arkells N, Fan TP, Fiebich BL, Freissmuth M,  
553 Georgiev MI, Gibbons S, Godfrey KM, Gruber CW, Heer J, Huber LA, Ibanez E,  
554 Kijjoo A, Kiss AK, Lu A, Macias FA, Miller MJS, Mocan A, Müller R, Nicoletti F,  
555 Perry G, Pittalà V, Rastrelli L, Ristow M, Russo GL, Silva AS, Schuster D, Sheridan  
556 H, Skalicka-Woźniak K, Skaltsounis L, Sobarzo-Sánchez E, Bredt DS, Stuppner H,  
557 Sureda A, Tzvetkov NT, Vacca RA, Aggarwal BB, Battino M, Giampieri F, Wink M,  
558 Wolfender JL, Xiao J, Yeung AWK, Lizard G, Popp MA, Heinrich M, Berindan-



- 559 Neagoe I, Stadler M, Daglia M, Verpoorte R, Supuran CT. 2021. Natural products in  
560 drug discovery: advances and opportunities. *Nat Rev Drug Discov. Nature Research*.
- 561 5. Hawksworth DL, Honegger R. 1994. The lichen thallus: a symbiotic phenotype of  
562 nutritionally specialized fungi and its response to gall producers., p. 77–98. *In*  
563 Williams, MAJ (ed.), *Plant Galls: Organisms, Interactions, Populations*. Clarendon  
564 Press, Oxford.
- 565 6. Ahmadjian V. 1993. *The Lichen Symbiosis*. John Wiley and Sons., New York.
- 566 7. Ahmadjian V. 1982. Algal/fungal symbioses., p. 179–233. *In* Round, FE Chapman, DJ  
567 (ed.), *Progress in Phycological Research*. Elsevier Biomedical Press, Amsterdam.
- 568 8. Calchera A, Dal Grande F, Bode HB, Schmitt I. 2019. Biosynthetic gene content of the  
569 “perfume lichens” *Evernia prunastri* and *Pseudevernia furfuracea*. *Molecules* 24:203.
- 570 9. Goga M, Elečko J, Marcinčinová M, Ručová D, Bačkorová M, Bačkor M. 2020.  
571 Lichen metabolites: an overview of some secondary metabolites and their biological  
572 potential, p. 175–209. *In* .
- 573 10. Boustie J, Grube M. 2005. Lichens—a promising source of bioactive secondary  
574 metabolites. *Plant Genet Resour* 3:273–287.
- 575 11. Kim W, Liu R, Woo S, Kang K Bin, Park H, Yu YH, Ha H-H, Oh S-Y, Yang JH, Kim  
576 H, Yun S-H, Hur J-S. 2021. Linking a gene cluster to atranorin, a major cortical  
577 substance of lichens, through genetic dereplication and heterologous expression. *MBio*  
578 e0111121.
- 579 12. Kealey JT, Craig JP, Barr PJ. 2021. Identification of a lichen depside polyketide  
580 synthase gene by heterologous expression in *Saccharomyces cerevisiae*. *Metab Eng*  
581 *Commun* e00172.
- 582 13. Armaleo D, Sun X, Culberson C. 2011. Insights from the first putative biosynthetic  
25

- 583 gene cluster for a lichen depside and depsidone. *Mycologia* 103:741–754.
- 584 14. Singh G, Armaleo D, Dal Grande F, Schmitt I. 2021. Depside and depsidone synthesis  
585 in lichenized fungi comes into focus through a genome-wide comparison of the  
586 olivetoric acid and physodic acid chemotypes of *Pseudevernia furfuracea*.  
587 *Biomolecules* 11:1445.
- 588 15. Barbero M, Artuso E, Prandi C. 2017. Fungal anticancer metabolites: synthesis towards  
589 drug discovery. *Curr Med Chem* 25:141–185.
- 590 16. Stanojković T. 2015. Investigations of lichen secondary metabolites with potential  
591 anticancer activity, p. 127–146. *In* Lichen Secondary Metabolites: Bioactive Properties  
592 and Pharmaceutical Potential. Springer International Publishing.
- 593 17. Ingelfinger R, Henke M, Roser L, Ulshöfer T, Calchera A, Singh G, Parnham MJ,  
594 Geisslinger G, Fürst R, Schmitt I, Schiffmann S. 2020. Unraveling the pharmacological  
595 potential of lichen extracts in the context of cancer and inflammation with a broad  
596 screening approach. *Front Pharmacol* 11:1322.
- 597 18. Molnár K, Farkas E. 2010. Current results on biological activities of lichen secondary  
598 metabolites: A review. *Zeitschrift für Naturforsch - Sect C J Biosci*. Verlag der  
599 *Zeitschrift für Naturforschung*.
- 600 19. Van Santen JA, Kautsar SA, Medema MH, Linington RG. 2021. Microbial natural  
601 product databases: Moving forward in the multi-omics era. *Nat Prod Rep*. Royal  
602 Society of Chemistry.
- 603 20. Bachmann BO, Van Lanen SG, Baltz RH. 2014. Microbial genome mining for  
604 accelerated natural products discovery: Is a renaissance in the making? *J Ind Microbiol*  
605 *Biotechnol*. *J Ind Microbiol Biotechnol*.
- 606 21. Pizarro D, Divakar PK, Grewe F, Crespo A, Dal Grande F, Lumbsch HT. 2020.

- 607 Genome-wide analysis of biosynthetic gene cluster reveals correlated gene loss with  
608 absence of usnic acid in lichen-forming fungi. *Genome Biol Evol* 12:1858–1868.
- 609 22. Abdel-Hameed M, Bertrand RL, Piercey-Normore MD, Sorensen JL. 2016. Putative  
610 identification of the usnic acid biosynthetic gene cluster by de novo whole-genome  
611 sequencing of a lichen-forming fungus. *Fungal Biol* 120:306–316.
- 612 23. Nguyen K-H, Chollet-Krugler M, Gouault N, Tomasi S. 2013. UV-protectant  
613 metabolites from lichens and their symbiotic partners. *Nat Prod Rep* 30:1490.
- 614 24. Lohezic-Le Devehat F, Legouin B, Couteau C, Boustie J, Coiffard L. 2013. Lichenic  
615 extracts and metabolites as UV filters. *J Photochem Photobiol B Biol* 120:17–28.
- 616 25. Buçukoglu TZ, Albayrak S, Halici MG, Tay T. 2013. Antimicrobial and antioxidant  
617 activities of extracts and lichen acids obtained from some *Umbilicaria* species from  
618 central Anatolia, Turkey. *J Food Process Preserv* 37:1103–1110.
- 619 26. Posner B, Feige GB, Huneck S. 1992. Studies on the chemistry of the lichen genus  
620 *Umbilicaria* hoffm. *Zeitschrift fur Naturforsch - Sect C J Biosci* 47:1–9.
- 621 27. Narui T, Culberson CF, Culberson WL, Johnson A, Shibata S. 1996. A contribution to  
622 the chemistry of the lichen family umbilicariaceae (Ascomycotina). *Bryologist* 99:199–  
623 211.
- 624 28. Davydov EA, Peršoh D, Rambold G. 2017. Umbilicariaceae (lichenized Ascomycota)  
625 – Trait evolution and a new generic concept. *Taxon* 66:1282–1303.
- 626 29. Singh G, Calchera A, Schulz M, Drechsler M, Bode HB, Schmitt I, Dal Grande F.  
627 2021. Climate-specific biosynthetic gene clusters in populations of a lichen-forming  
628 fungus. *Environ Microbiol* 00:1462-2920.15605.
- 629 30. Rubio-Piña JA, Zapata-Pérez O. 2011. Isolation of total RNA from tissues rich in  
630 polyphenols and polysaccharides of mangrove plants. *Electron J Biotechnol* 14.

- 631 31. Merges D, Dal Grande F, Greve C, Otte J, Schmitt I. 2021. Virus diversity in  
632 metagenomes of a lichen symbiosis (*Umbilicaria phaea*): complete viral genomes,  
633 putative hosts and elevational distributions. *Environ Microbiol* 23:6637–6650.
- 634 32. Kolmogorov M, Yuan J, Lin Y, Pevzner PA. 2019. Assembly of long, error-prone  
635 reads using repeat graphs. *Nat Biotechnol* 37:540–546.
- 636 33. Qin M, Wu S, Li A, Zhao F, Feng H, Ding L, Ruan J. 2019. LRScf: Improving draft  
637 genomes using long noisy reads. *BMC Genomics* 20:955.
- 638 34. Huson DH, Beier S, Flade I, Górska A, El-Hadidi M, Mitra S, Ruscheweyh H-J, Tappu  
639 R. 2016. MEGAN Community Edition - Interactive exploration and analysis of large-  
640 scale microbiome sequencing data. *PLOS Comput Biol* 12:e1004957.
- 641 35. Bradnam KR, Fass JN, Alexandrov A, Baranay P, Bechner M, Birol I, Boisvert S,  
642 Chapman JA, Chapuis G, Chikhi R, Chitsaz H, Chou W-C, Corbeil J, Del Fabbro C,  
643 Docking TR, Durbin R, Earl D, Emrich S, Fedotov P, Fonseca NA, Ganapathy G,  
644 Gibbs RA, Gnerre S, Godzaridis É, Goldstein S, Haimel M, Hall G, Haussler D, Hiatt  
645 JB, Ho IY, Howard J, Hunt M, Jackman SD, Jaffe DB, Jarvis ED, Jiang H, Kazakov S,  
646 Kersey PJ, Kitzman JO, Knight JR, Koren S, Lam T-W, Lavenier D, Laviolette F, Li  
647 Y, Li Z, Liu B, Liu Y, Luo R, MacCallum I, MacManes MD, Maillet N, Melnikov S,  
648 Naquin D, Ning Z, Otto TD, Paten B, Paulo OS, Phillippy AM, Pina-Martins F, Place  
649 M, Przybylski D, Qin X, Qu C, Ribeiro FJ, Richards S, Rokhsar DS, Ruby JG,  
650 Scalabrin S, Schatz MC, Schwartz DC, Sergushichev A, Sharpe T, Shaw TI, Shendure  
651 J, Shi Y, Simpson JT, Song H, Tsarev F, Vezzi F, Vicedomini R, Vieira BM, Wang J,  
652 Worley KC, Yin S, Yiu S-M, Yuan J, Zhang G, Zhang H, Zhou S, Korf IF. 2013.  
653 Assemblathon 2: evaluating de novo methods of genome assembly in three vertebrate  
654 species. *Gigascience* 2:10.

- 655 36. Simão FA, Waterhouse RM, Ioannidis P, Kriventseva E V., Zdobnov EM. 2015.  
656 BUSCO: assessing genome assembly and annotation completeness with single-copy  
657 orthologs. *Bioinformatics* 31:3210–3212.
- 658 37. Blin K, Shaw S, Steinke K, Villebro R, Ziemert N, Lee SY, Medema MH, Weber T.  
659 2019. antiSMASH 5.0: updates to the secondary metabolite genome mining pipeline.  
660 *Nucleic Acids Res* 47:W81–W87.
- 661 38. Palmer J, Stajich J. 2019. Funannotate v1.7.4. Zenodo  
662 <https://doi.org/https://doi.org/10.5281/ZENODO.2604804>.
- 663 39. Borodovsky M, Lomsadze A. 2011. Eukaryotic gene prediction using GeneMark.hmm-  
664 E and GeneMark-ES. *Curr Protoc Bioinforma* CHAPTER:Unit-4.610.
- 665 40. Quevillon E, Silventoinen V, Pillai S, Harte N, Mulder N, Apweiler R, Lopez R. 2005.  
666 InterProScan: Protein domains identifier. *Nucleic Acids Res* 33:W116.
- 667 41. Huerta-Cepas J, Szklarczyk D, Heller D, Hernández-Plaza A, Forslund SK, Cook H,  
668 Mende DR, Letunic I, Rattei T, Jensen LJ, Von Mering C, Bork P. 2019. EggNOG 5.0:  
669 A hierarchical, functionally and phylogenetically annotated orthology resource based  
670 on 5090 organisms and 2502 viruses. *Nucleic Acids Res* 47:D309–D314.
- 671 42. Huerta-Cepas J, Forslund K, Coelho LP, Szklarczyk D, Jensen LJ, Von Mering C,  
672 Bork P. 2017. Fast genome-wide functional annotation through orthology assignment  
673 by eggNOG-mapper. *Mol Biol Evol* 34:2115–2122.
- 674 43. Almagro Armenteros JJ, Tsirigos KD, Sønderby CK, Petersen TN, Winther O, Brunak  
675 S, von Heijne G, Nielsen H. 2019. SignalP 5.0 improves signal peptide predictions  
676 using deep neural networks. *Nat Biotechnol* 37:420–423.
- 677 44. Katoh K, Kuma K, Toh H, Miyata T. 2005. MAFFT version 5: improvement in  
678 accuracy of multiple sequence alignment. *Nucleic Acids Res* 33:511–8.

- 679 45. Drummond AJ, Ashton B, Buxton S, Cheung M, Cooper A, Duran C, Field M, Heled J,  
680 Kears M, Markowitz S, Moir R, Stones-Havas S, Sturrock S, Thierer T, Wilson A.  
681 2011. Geneious. 5.4.
- 682 46. Stamatakis A. 2006. RAxML-VI-HPC: maximum likelihood-based phylogenetic  
683 analyses with thousands of taxa and mixed models. *Bioinformatics* 22:2688–90.
- 684 47. Miller MA, Pfeiffer W, Schwartz T. 2010. Creating the CIPRES Science Gateway for  
685 inference of large phylogenetic trees, p. 1–8. *In* Proceedings of the Gateway  
686 Computing Environments Workshop (GCE) New Orleans.
- 687 48. Letunic I, Bork P. 2021. Interactive tree of life (iTOL) v5: An online tool for  
688 phylogenetic tree display and annotation. *Nucleic Acids Res* 49:W293–W296.
- 689 49. Navarro-Muñoz JC, Selem-Mojica N, Mallowney MW, Kautsar SA, Tryon JH,  
690 Parkinson EI, De Los Santos ELC, Yeong M, Cruz-Morales P, Abubucker S, Roeters  
691 A, Lokhorst W, Fernandez-Guerra A, Cappelini LTD, Goering AW, Thomson RJ,  
692 Metcalf WW, Kelleher NL, Barona-Gomez F, Medema MH. 2020. A computational  
693 framework to explore large-scale biosynthetic diversity. *Nat Chem Biol* 16:60–68.
- 694 50. Kautsar SA, Blin K, Shaw S, Navarro-Muñoz JC, Terlouw BR, Van Der Hooft JJJ,  
695 Van Santen JA, Tracanna V, Suarez Duran HG, Pascal Andreu V, Selem-Mojica N,  
696 Alanjary M, Robinson SL, Lund G, Epstein SC, Sisto AC, Charkoudian LK, Collemare  
697 J, Linington RG, Weber T, Medema MH. 2020. MIBiG 2.0: A repository for  
698 biosynthetic gene clusters of known function. *Nucleic Acids Res* 48:D454–D458.
- 699 51. Martinet L, Naômé A, Deflandre B, Maciejewska M, Tellatin D, Tenconi E,  
700 Smargiasso N, De Pauw E, Van Wezel GP, Rigali S. 2019. A single biosynthetic gene  
701 cluster is responsible for the production of bagremycin antibiotics and ferroverdin iron  
702 chelators. *MBio* 10:e01230-19.

- 703 52. Armaleo D. 1995. Factors affecting depside and depsidone biosynthesis in a cultured  
704 lichen fungus. *Crypt Bot* 5:14–21.
- 705 53. Wasil Z, Pahirulzaman KAK, Butts C, Simpson TJ, Lazarus CM, Cox RJ. 2013. One  
706 pathway, many compounds: Heterologous expression of a fungal biosynthetic pathway  
707 reveals its intrinsic potential for diversity. *Chem Sci* 4:3845–3856.
- 708 54. Chen L, Yue Q, Zhang X, Xiang M, Wang C, Li S, Che Y, Ortiz-López FJ, Bills GF,  
709 Liu X, An Z. 2013. Genomics-driven discovery of the pneumocandin biosynthetic gene  
710 cluster in the fungus *Glarea lozoyensis*. *BMC Genomics* 14.
- 711 55. Chen L, Li Y, Yue Q, Lokszejn A, Yokoyama K, Felix EA, Liu X, Zhang N, An Z,  
712 Bills GF. 2016. Engineering of new pneumocandin side-chain analogues from *Glarea*  
713 *lozoyensis* by mutasynthesis and evaluation of their antifungal activity. *ACS Chem*  
714 *Biol* 11:2724–2733.
- 715 56. Li Y, Chen L, Yue Q, Liu X, An Z, Bills GF. 2015. Genetic manipulation of the  
716 pneumocandin biosynthetic pathway for generation of analogues and evaluation of  
717 their antifungal activity. *ACS Chem Biol* 10:1702–1710.
- 718 57. Leuckert C. 1985. Probleme der Flechten-Chemotaxonomie -- Stoffkombinationen und  
719 ihre taxonomische Wertung. Problems of lichen chemotaxonomy -- patterns of  
720 substances and their taxonomical valuation. *Ber Dtsch Bot Ges* 98:401–408.
- 721 58. Davydov EA, Blum OB, Kashevarov GP, Grakhov VP. 2019. Umbilicaria  
722 subpolyphylla Oxner: The correct name for *U. iberica* Sancho & Krzewicka and its  
723 bipolar distribution pattern. *Lichenologist*. Cambridge University Press.
- 724
- 725 2. Newman DJ, Cragg GM. 2020. Natural products as sources of new drugs over the  
726 nearly four decades from 01/1981 to 09/2019. *J Nat Prod*. American Chemical Society.

- 727 3. Newman DJ, Cragg GM. 2007. Natural products as sources of new drugs over the last  
728 25 years. *J Nat Prod*.
- 729 4. Atanasov AG, Zotchev SB, Dirsch VM, Orhan IE, Banach M, Rollinger JM, Barreca  
730 D, Weckwerth W, Bauer R, Bayer EA, Majeed M, Bishayee A, Bochkov V, Bonn GK,  
731 Braidy N, Bucar F, Cifuentes A, D'Onofrio G, Bodkin M, Diederich M, Dinkova-  
732 Kostova AT, Efferth T, El Bairi K, Arkells N, Fan TP, Fiebich BL, Freissmuth M,  
733 Georgiev MI, Gibbons S, Godfrey KM, Gruber CW, Heer J, Huber LA, Ibanez E,  
734 Kijjoo A, Kiss AK, Lu A, Macias FA, Miller MJS, Mocan A, Müller R, Nicoletti F,  
735 Perry G, Pittalà V, Rastrelli L, Ristow M, Russo GL, Silva AS, Schuster D, Sheridan  
736 H, Skalicka-Woźniak K, Skaltsounis L, Sobarzo-Sánchez E, Brecht DS, Stuppner H,  
737 Sureda A, Tzvetkov NT, Vacca RA, Aggarwal BB, Battino M, Giampieri F, Wink M,  
738 Wolfender JL, Xiao J, Yeung AWK, Lizard G, Popp MA, Heinrich M, Berindan-  
739 Neagoe I, Stadler M, Daglia M, Verpoorte R, Supuran CT. 2021. Natural products in  
740 drug discovery: advances and opportunities. *Nat Rev Drug Discov. Nature Research*.
- 741 5. Hawksworth DL, Honegger R. 1994. The lichen thallus: a symbiotic phenotype of  
742 nutritionally specialized fungi and its response to gall producers., p. 77–98. *In*  
743 Williams, MAJ (ed.), *Plant Galls: Organisms, Interactions, Populations*. Clarendon  
744 Press, Oxford.
- 745 6. Ahmadjian V. 1993. *The Lichen Symbiosis*. John Wiley and Sons., New York.
- 746 7. Ahmadjian V. 1982. Algal/fungal symbioses., p. 179–233. *In* Round, FE Chapman, DJ  
747 (ed.), *Progress in Phycological Research*. Elsevier Biomedical Press, Amsterdam.
- 748 8. Calchera A, Dal Grande F, Bode HB, Schmitt I. 2019. Biosynthetic gene content of the  
749 “perfume lichens” *Evernia prunastri* and *Pseudevernia furfuracea*. *Molecules* 24:203.
- 750 9. Goga M, Elečko J, Marcinčinová M, Ručová D, Bačkorová M, Bačkor M. 2020.



- 751 Lichen metabolites: an overview of some secondary metabolites and their biological  
752 potential, p. 175–209. *In* .
- 753 10. Boustie J, Grube M. 2005. Lichens—a promising source of bioactive secondary  
754 metabolites. *Plant Genet Resour* 3:273–287.
- 755 11. Kim W, Liu R, Woo S, Kang K Bin, Park H, Yu YH, Ha H-H, Oh S-Y, Yang JH, Kim  
756 H, Yun S-H, Hur J-S. 2021. Linking a gene cluster to atranorin, a major cortical  
757 substance of lichens, through genetic dereplication and heterologous expression. *MBio*  
758 e0111121.
- 759 12. Kealey JT, Craig JP, Barr PJ. 2021. Identification of a lichen depside polyketide  
760 synthase gene by heterologous expression in *Saccharomyces cerevisiae*. *Metab Eng*  
761 *Commun* e00172.
- 762 13. Armaleo D, Sun X, Culberson C. 2011. Insights from the first putative biosynthetic  
763 gene cluster for a lichen depside and depsidone. *Mycologia* 103:741–754.
- 764 14. Singh G, Armaleo D, Dal Grande F, Schmitt I. 2021. Depside and depsidone synthesis  
765 in lichenized fungi comes into focus through a genome-wide comparison of the  
766 olivetoric acid and physodic acid chemotypes of *Pseudevernia furfuracea*.  
767 *Biomolecules* 11:1445.
- 768 15. Barbero M, Artuso E, Prandi C. 2017. Fungal anticancer metabolites: synthesis towards  
769 drug discovery. *Curr Med Chem* 25:141–185.
- 770 16. Stanojković T. 2015. Investigations of lichen secondary metabolites with potential  
771 anticancer activity, p. 127–146. *In* *Lichen Secondary Metabolites: Bioactive Properties*  
772 *and Pharmaceutical Potential*. Springer International Publishing.
- 773 17. Ingelfinger R, Henke M, Roser L, Ulshöfer T, Calchera A, Singh G, Parnham MJ,  
774 Geisslinger G, Fürst R, Schmitt I, Schiffmann S. 2020. Unraveling the pharmacological

- 775 potential of lichen extracts in the context of cancer and inflammation with a broad  
776 screening approach. *Front Pharmacol* 11:1322.
- 777 18. Molnár K, Farkas E. 2010. Current results on biological activities of lichen secondary  
778 metabolites: A review. *Zeitschrift fur Naturforsch - Sect C J Biosci*. Verlag der  
779 *Zeitschrift fur Naturforschung*.
- 780 19. Van Santen JA, Kautsar SA, Medema MH, Linington RG. 2021. Microbial natural  
781 product databases: Moving forward in the multi-omics era. *Nat Prod Rep*. Royal  
782 Society of Chemistry.
- 783 20. Bachmann BO, Van Lanen SG, Baltz RH. 2014. Microbial genome mining for  
784 accelerated natural products discovery: Is a renaissance in the making? *J Ind Microbiol*  
785 *Biotechnol*. *J Ind Microbiol Biotechnol*.
- 786 21. Pizarro D, Divakar PK, Grewe F, Crespo A, Dal Grande F, Lumbsch HT. 2020.  
787 Genome-wide analysis of biosynthetic gene cluster reveals correlated gene loss with  
788 absence of usnic acid in lichen-forming fungi. *Genome Biol Evol* 12:1858–1868.
- 789 22. Abdel-Hameed M, Bertrand RL, Piercey-Normore MD, Sorensen JL. 2016. Putative  
790 identification of the usnic acid biosynthetic gene cluster by de novo whole-genome  
791 sequencing of a lichen-forming fungus. *Fungal Biol* 120:306–316.
- 792 23. Nguyen K-H, Chollet-Krugler M, Gouault N, Tomasi S. 2013. UV-protectant  
793 metabolites from lichens and their symbiotic partners. *Nat Prod Rep* 30:1490.
- 794 24. Lohezic-Le Devehat F, Legouin B, Couteau C, Boustie J, Coiffard L. 2013. Lichenic  
795 extracts and metabolites as UV filters. *J Photochem Photobiol B Biol* 120:17–28.
- 796 25. Buçukoglu TZ, Albayrak S, Halici MG, Tay T. 2013. Antimicrobial and antioxidant  
797 activities of extracts and lichen acids obtained from some *Umbilicaria* species from  
798 central Anatolia, Turkey. *J Food Process Preserv* 37:1103–1110.

- 799 26. Posner B, Feige GB, Huneck S. 1992. Studies on the chemistry of the lichen genus  
800 *Umbilicaria* hoffm. Zeitschrift fur Naturforsch - Sect C J Biosci 47:1–9.
- 801 27. Narui T, Culberson CF, Culberson WL, Johnson A, Shibata S. 1996. A contribution to  
802 the chemistry of the lichen family umbilicariaceae (Ascomycotina). Bryologist 99:199–  
803 211.
- 804 28. Davydov EA, Peršoh D, Rambold G. 2017. Umbilicariaceae (lichenized Ascomycota)  
805 – Trait evolution and a new generic concept. Taxon 66:1282–1303.
- 806 29. Singh G, Calchera A, Schulz M, Drechsler M, Bode HB, Schmitt I, Dal Grande F.  
807 2021. Climate-specific biosynthetic gene clusters in populations of a lichen-forming  
808 fungus. Environ Microbiol 00:1462-2920.15605.
- 809 30. Rubio-Piña JA, Zapata-Pérez O. 2011. Isolation of total RNA from tissues rich in  
810 polyphenols and polysaccharides of mangrove plants. Electron J Biotechnol 14.
- 811 31. Merges D, Dal Grande F, Greve C, Otte J, Schmitt I. 2021. Virus diversity in  
812 metagenomes of a lichen symbiosis (*Umbilicaria phaea*): complete viral genomes,  
813 putative hosts and elevational distributions. Environ Microbiol 23:6637–6650.
- 814 32. Kolmogorov M, Yuan J, Lin Y, Pevzner PA. 2019. Assembly of long, error-prone  
815 reads using repeat graphs. Nat Biotechnol 37:540–546.
- 816 33. Qin M, Wu S, Li A, Zhao F, Feng H, Ding L, Ruan J. 2019. LRScf: Improving draft  
817 genomes using long noisy reads. BMC Genomics 20:955.
- 818 34. Huson DH, Beier S, Flade I, Górska A, El-Hadidi M, Mitra S, Ruscheweyh H-J, Tappu  
819 R. 2016. MEGAN Community Edition - Interactive exploration and analysis of large-  
820 scale microbiome sequencing data. PLOS Comput Biol 12:e1004957.
- 821 35. Bradnam KR, Fass JN, Alexandrov A, Baranay P, Bechner M, Birol I, Boisvert S,  
822 Chapman JA, Chapuis G, Chikhi R, Chitsaz H, Chou W-C, Corbeil J, Del Fabbro C,

- 823 Docking TR, Durbin R, Earl D, Emrich S, Fedotov P, Fonseca NA, Ganapathy G,  
824 Gibbs RA, Gnerre S, Godzaridis É, Goldstein S, Haimel M, Hall G, Haussler D, Hiatt  
825 JB, Ho IY, Howard J, Hunt M, Jackman SD, Jaffe DB, Jarvis ED, Jiang H, Kazakov S,  
826 Kersey PJ, Kitzman JO, Knight JR, Koren S, Lam T-W, Lavenier D, Laviolette F, Li  
827 Y, Li Z, Liu B, Liu Y, Luo R, MacCallum I, MacManes MD, Maillet N, Melnikov S,  
828 Naquin D, Ning Z, Otto TD, Paten B, Paulo OS, Phillippy AM, Pina-Martins F, Place  
829 M, Przybylski D, Qin X, Qu C, Ribeiro FJ, Richards S, Rokhsar DS, Ruby JG,  
830 Scalabrin S, Schatz MC, Schwartz DC, Sergushichev A, Sharpe T, Shaw TI, Shendure  
831 J, Shi Y, Simpson JT, Song H, Tsarev F, Vezzi F, Vicedomini R, Vieira BM, Wang J,  
832 Worley KC, Yin S, Yiu S-M, Yuan J, Zhang G, Zhang H, Zhou S, Korf IF. 2013.  
833 Assemblathon 2: evaluating de novo methods of genome assembly in three vertebrate  
834 species. *Gigascience* 2:10.
- 835 36. Simão FA, Waterhouse RM, Ioannidis P, Kriventseva E V., Zdobnov EM. 2015.  
836 BUSCO: assessing genome assembly and annotation completeness with single-copy  
837 orthologs. *Bioinformatics* 31:3210–3212.
- 838 37. Blin K, Shaw S, Steinke K, Villebro R, Ziemert N, Lee SY, Medema MH, Weber T.  
839 2019. antiSMASH 5.0: updates to the secondary metabolite genome mining pipeline.  
840 *Nucleic Acids Res* 47:W81–W87.
- 841 38. Palmer J, Stajich J. 2019. Funannotate v1.7.4. Zenodo  
842 <https://doi.org/https://doi.org/10.5281/ZENODO.2604804>.
- 843 39. Borodovsky M, Lomsadze A. 2011. Eukaryotic gene prediction using GeneMark.hmm-  
844 E and GeneMark-ES. *Curr Protoc Bioinforma* CHAPTER:Unit-4.610.
- 845 40. Quevillon E, Silventoinen V, Pillai S, Harte N, Mulder N, Apweiler R, Lopez R. 2005.  
846 InterProScan: Protein domains identifier. *Nucleic Acids Res* 33:W116.

- 847 41. Huerta-Cepas J, Szklarczyk D, Heller D, Hernández-Plaza A, Forslund SK, Cook H,  
848 Mende DR, Letunic I, Rattei T, Jensen LJ, Von Mering C, Bork P. 2019. EggNOG 5.0:  
849 A hierarchical, functionally and phylogenetically annotated orthology resource based  
850 on 5090 organisms and 2502 viruses. *Nucleic Acids Res* 47:D309–D314.
- 851 42. Huerta-Cepas J, Forslund K, Coelho LP, Szklarczyk D, Jensen LJ, Von Mering C,  
852 Bork P. 2017. Fast genome-wide functional annotation through orthology assignment  
853 by eggNOG-mapper. *Mol Biol Evol* 34:2115–2122.
- 854 43. Almagro Armenteros JJ, Tsirigos KD, Sønderby CK, Petersen TN, Winther O, Brunak  
855 S, von Heijne G, Nielsen H. 2019. SignalP 5.0 improves signal peptide predictions  
856 using deep neural networks. *Nat Biotechnol* 37:420–423.
- 857 44. Katoh K, Kuma K, Toh H, Miyata T. 2005. MAFFT version 5: improvement in  
858 accuracy of multiple sequence alignment. *Nucleic Acids Res* 33:511–8.
- 859 45. Drummond AJ, Ashton B, Buxton S, Cheung M, Cooper A, Duran C, Field M, Heled J,  
860 Kearse M, Markowitz S, Moir R, Stones-Havas S, Sturrock S, Thierer T, Wilson A.  
861 2011. Geneious. 5.4.
- 862 46. Stamatakis A. 2006. RAxML-VI-HPC: maximum likelihood-based phylogenetic  
863 analyses with thousands of taxa and mixed models. *Bioinformatics* 22:2688–90.
- 864 47. Miller MA, Pfeiffer W, Schwartz T. 2010. Creating the CIPRES Science Gateway for  
865 inference of large phylogenetic trees, p. 1–8. *In* Proceedings of the Gateway  
866 Computing Environments Workshop (GCE) New Orleans.
- 867 48. Letunic I, Bork P. 2021. Interactive tree of life (iTOL) v5: An online tool for  
868 phylogenetic tree display and annotation. *Nucleic Acids Res* 49:W293–W296.
- 869 49. Navarro-Muñoz JC, Selem-Mojica N, Mullowney MW, Kautsar SA, Tryon JH,  
870 Parkinson EI, De Los Santos ELC, Yeong M, Cruz-Morales P, Abubucker S, Roeters

- 871 A, Lokhorst W, Fernandez-Guerra A, Cappelini LTD, Goering AW, Thomson RJ,  
872 Metcalf WW, Kelleher NL, Barona-Gomez F, Medema MH. 2020. A computational  
873 framework to explore large-scale biosynthetic diversity. *Nat Chem Biol* 16:60–68.
- 874 50. Kautsar SA, Blin K, Shaw S, Navarro-Muñoz JC, Terlouw BR, Van Der Hooft JJJ,  
875 Van Santen JA, Tracanna V, Suarez Duran HG, Pascal Andreu V, Selem-Mojica N,  
876 Alanjary M, Robinson SL, Lund G, Epstein SC, Sisto AC, Charkoudian LK, Collemare  
877 J, Linington RG, Weber T, Medema MH. 2020. MIBiG 2.0: A repository for  
878 biosynthetic gene clusters of known function. *Nucleic Acids Res* 48:D454–D458.
- 879 51. Martinet L, Naômé A, Deflandre B, Maciejewska M, Tellatin D, Tenconi E,  
880 Smargiasso N, De Pauw E, Van Wezel GP, Rigali S. 2019. A single biosynthetic gene  
881 cluster is responsible for the production of bagremycin antibiotics and feroverdin iron  
882 chelators. *MBio* 10:e01230-19.
- 883 52. Armaleo D. 1995. Factors affecting depside and depsidone biosynthesis in a cultured  
884 lichen fungus. *Crypt Bot* 5:14–21.
- 885 53. Wasil Z, Pahirulzaman KAK, Butts C, Simpson TJ, Lazarus CM, Cox RJ. 2013. One  
886 pathway, many compounds: Heterologous expression of a fungal biosynthetic pathway  
887 reveals its intrinsic potential for diversity. *Chem Sci* 4:3845–3856.
- 888 54. Chen L, Yue Q, Zhang X, Xiang M, Wang C, Li S, Che Y, Ortiz-López FJ, Bills GF,  
889 Liu X, An Z. 2013. Genomics-driven discovery of the pneumocandin biosynthetic gene  
890 cluster in the fungus *Glarea lozoyensis*. *BMC Genomics* 14.
- 891 55. Chen L, Li Y, Yue Q, Lokszejn A, Yokoyama K, Felix EA, Liu X, Zhang N, An Z,  
892 Bills GF. 2016. Engineering of new pneumocandin side-chain analogues from *Glarea*  
893 *lozoyensis* by mutasynthesis and evaluation of their antifungal activity. *ACS Chem*  
894 *Biol* 11:2724–2733.

- 895 56. Li Y, Chen L, Yue Q, Liu X, An Z, Bills GF. 2015. Genetic manipulation of the  
896 pneumocandin biosynthetic pathway for generation of analogues and evaluation of  
897 their antifungal activity. *ACS Chem Biol* 10:1702–1710.
- 898 57. Leuckert C. 1985. Probleme der Flechten-Chemotaxonomie -- Stoffkombinationen und  
899 ihre taxonomische Wertung. Problems of lichen chemotaxonomy -- patterns of  
900 substances and their taxonomical valuation. *Ber Dtsch Bot Ges* 98:401–408.  
901

**Table 1 Genome quality and annotation statistics**

| Species                          | TBG number | ccs HiFi yield | # scaffolds | N50     | Completeness | assembly size (Mb) | # Genes | # Proteins |
|----------------------------------|------------|----------------|-------------|---------|--------------|--------------------|---------|------------|
| <i>Umbilicaria freyi</i>         | TBG_2329   | 47.39%         | 113         | 2575640 | 95.7         | 53.4               | 10,156  | 10,065     |
| <i>Umbilicaria freyi</i>         | TBG_2330   | 46.41%         | 54          | 2043163 | 85.9         | 50                 | 8,848   | 8,773      |
| <i>Umbilicaria deusta</i>        | TBG_2334   | 47.86%         | 47          | 1669916 | 97.6         | 41.6               | 8,949   | 8,857      |
| <i>Umbilicaria deusta</i>        | TBG_2335   | 43.54%         | 42          | 1865302 | 90.2         | 37.4               | 8,194   | 8,049      |
| <i>Umbilicaria hispanica</i>     | TBG_2322   | 38.71%         | 130         | 3125324 | 96.8         | 43.4               | 9,111   | 9,021      |
| <i>Umbilicaria hispanica</i>     | TBG_2337   | 54.22%         | 60          | 4226768 | 97.3         | 41.9               | 8,781   | 8,696      |
| <i>Umbilicaria pustulata</i>     | TBG_2333   | 33%            | 26          | 2620629 | 97.3         | 37.7               | 9,569   | 9,503      |
| <i>Umbilicaria pustulata</i>     | TBG_2345   | 32.26%         | 31          | 2364512 | 96.8         | 35.7               | 8,790   | 8,740      |
| <i>Umbilicaria spodochoa</i>     | TBG_2434   | 34.20%         | 139         | 993216  | 97.0         | 40.9               | 8,791   | 8,705      |
| <i>Umbilicaria spodochoa</i>     | TBG_2435   | 40.93%         | 97          | 1249424 | 97.1         | 40.1               | 8,612   | 8,507      |
| <i>Umbilicaria subpolyphylla</i> | TBG_2323   | 41.14%         | 190         | 1544375 | 99.6         | 58.2               | 16,993  | 16,852     |
| <i>Umbilicaria subpolyphylla</i> | TBG_2324   | 33.68%         | 42          | 1514392 | 97.6         | 33.7               | 8,556   | 8,410      |
| <i>Umbilicaria grisea</i>        | TBG_2336   | 42.54%         | 40          | 1822796 | 96.9         | 44.43              | NA      | NA         |
| <i>Dermatocarpon miniatum</i>    | TBG_2326   | 29.36%         | 28          | 5077191 | 98.1         | 63.5               | 9,273   | 9,189      |
| <i>Dermatocarpon miniatum</i>    | TBG_2331   | 26.28%         | 22          | 4245366 | 98.4         | 49.8               | 7,938   | 7,871      |

902



**Figure 1**

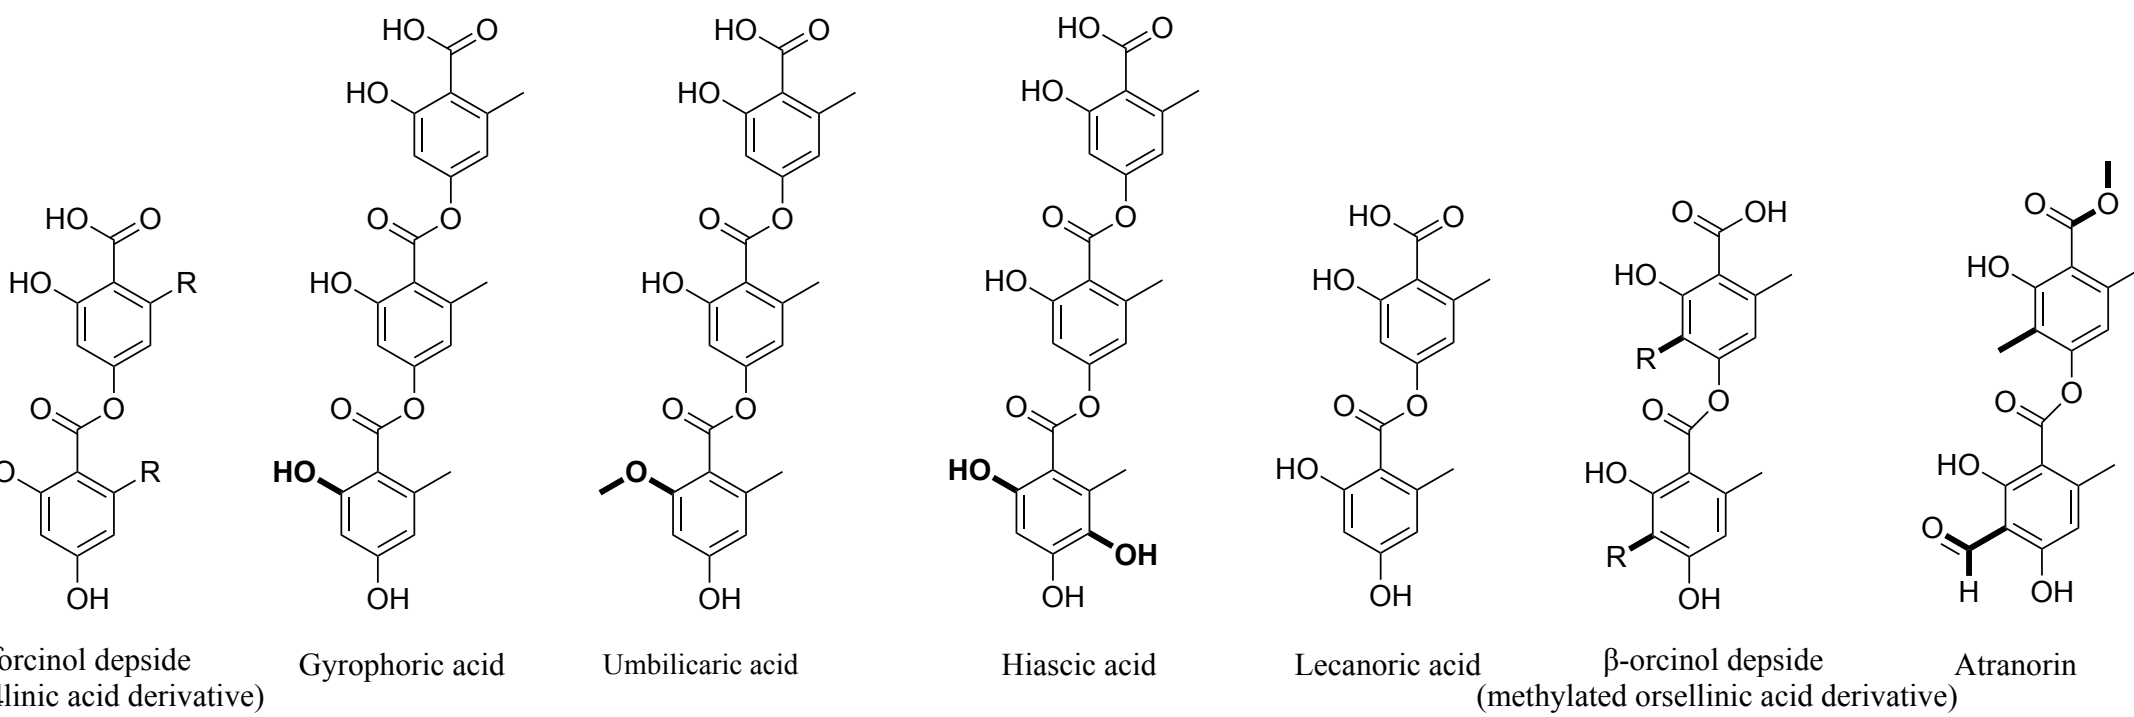

**Figure 2**

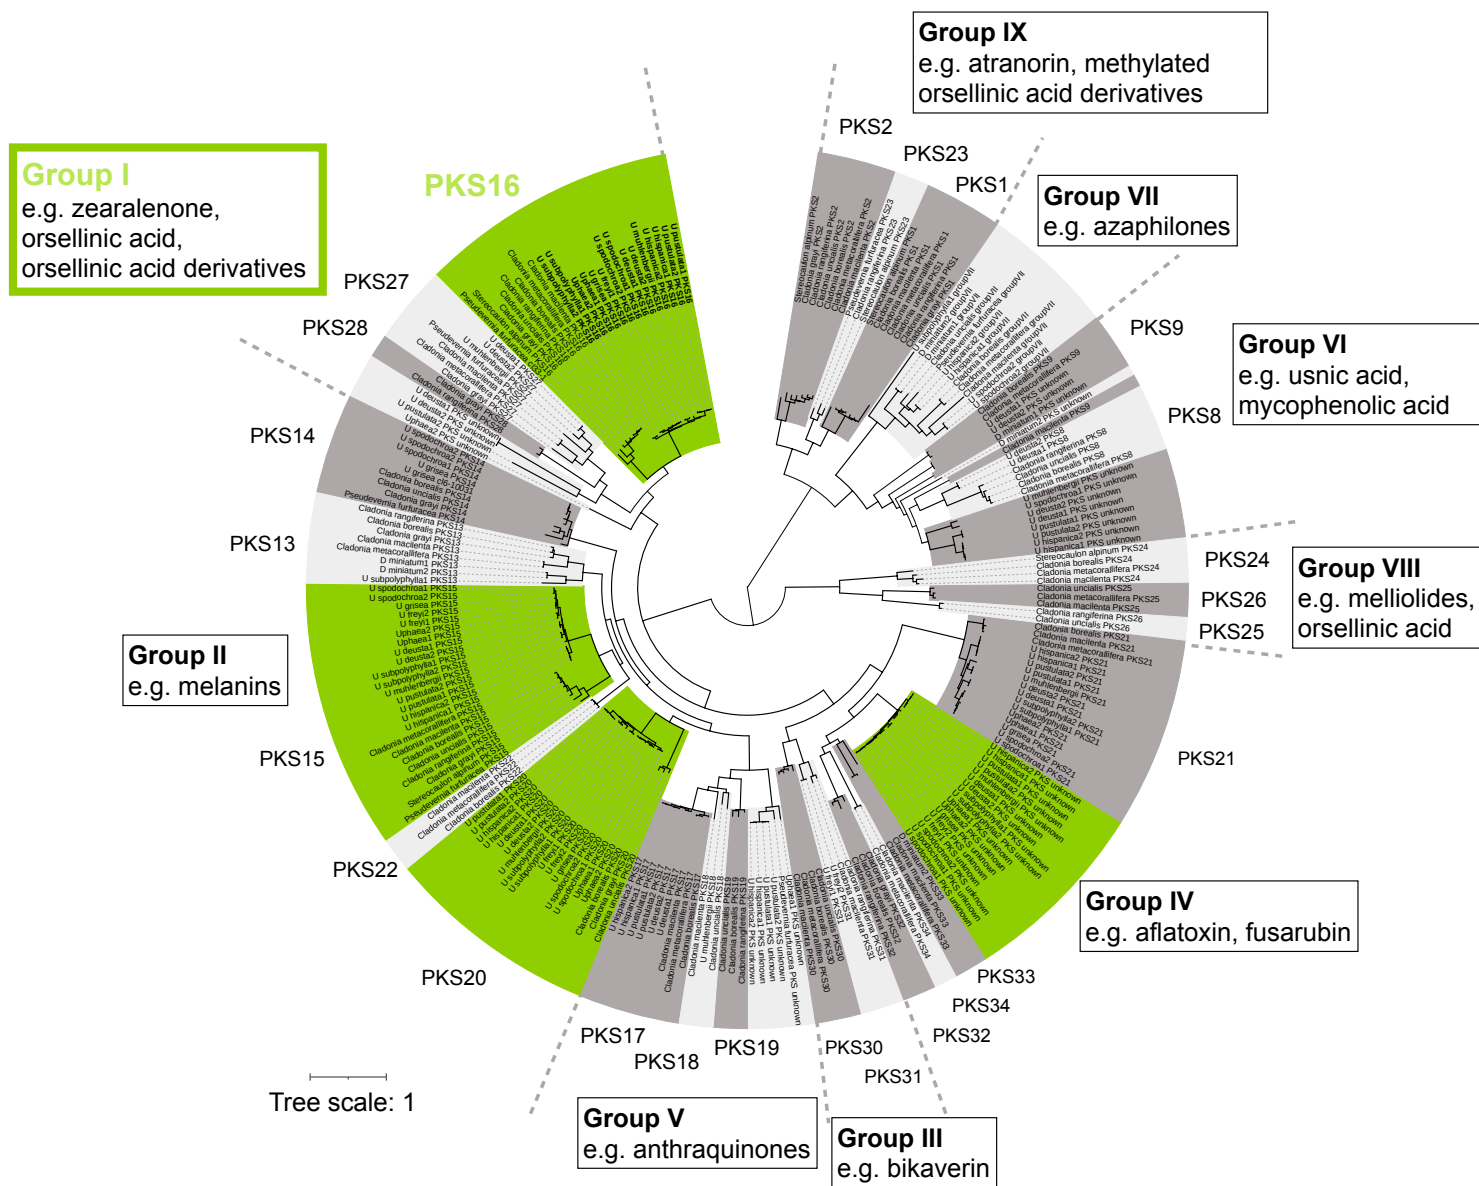

**Figure 3**

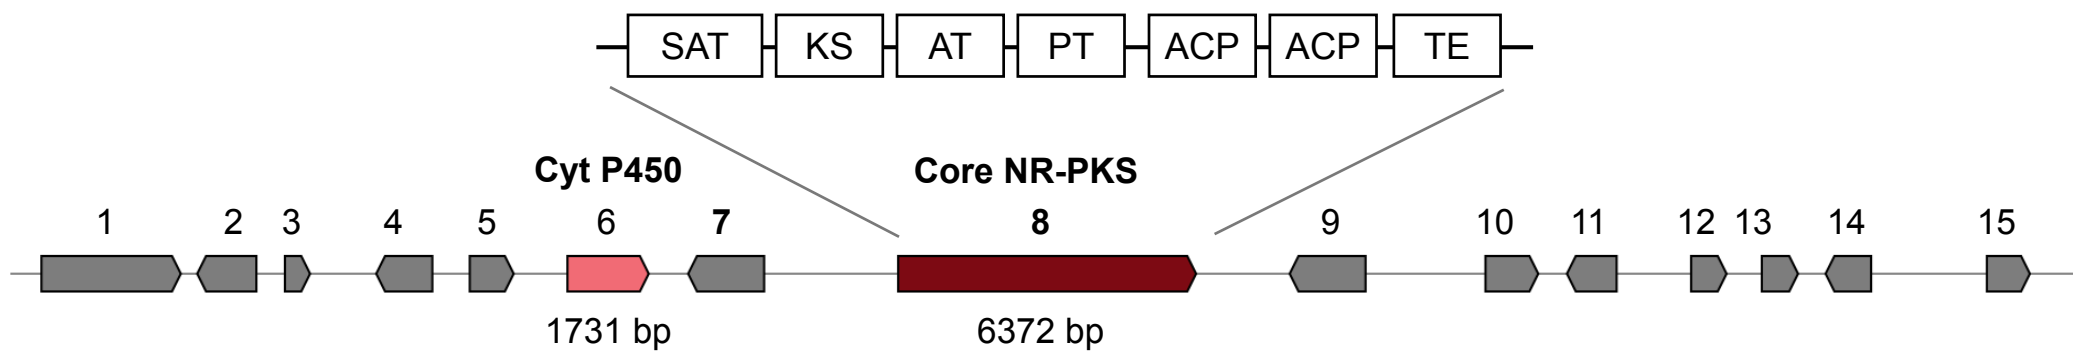

**Figure 4**

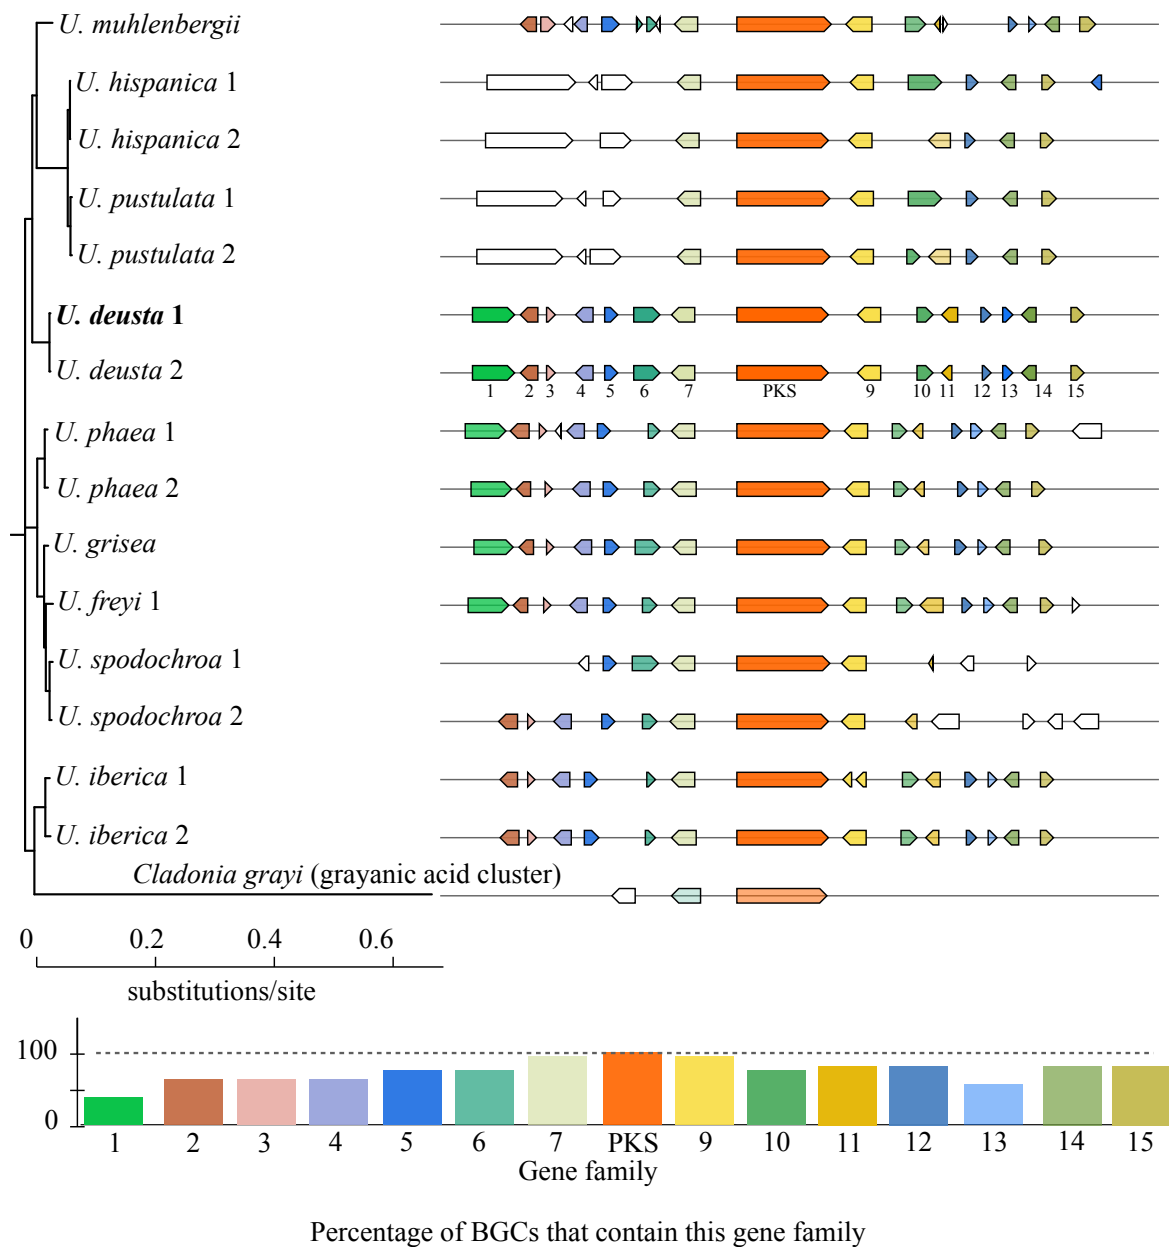

Source: http://biorxiv.org/content/10.1101/2022.01.14.475839v1.full.pdf
